# Supplementary material for: Associations of Serum Magnesium with Brain Morphology and Subclinical Cerebrovascular Disease: The Atherosclerosis Risk in Communities-Neurocognitive Study
Source: MDPI journal article supplement (doi:10.3390/nu13124496), 2021-12-16
Supplement: s1 [file s1]

**Supplemental Figure S1.** Forest plot of the association of magnesium with brain volumes in participants at visit 5.

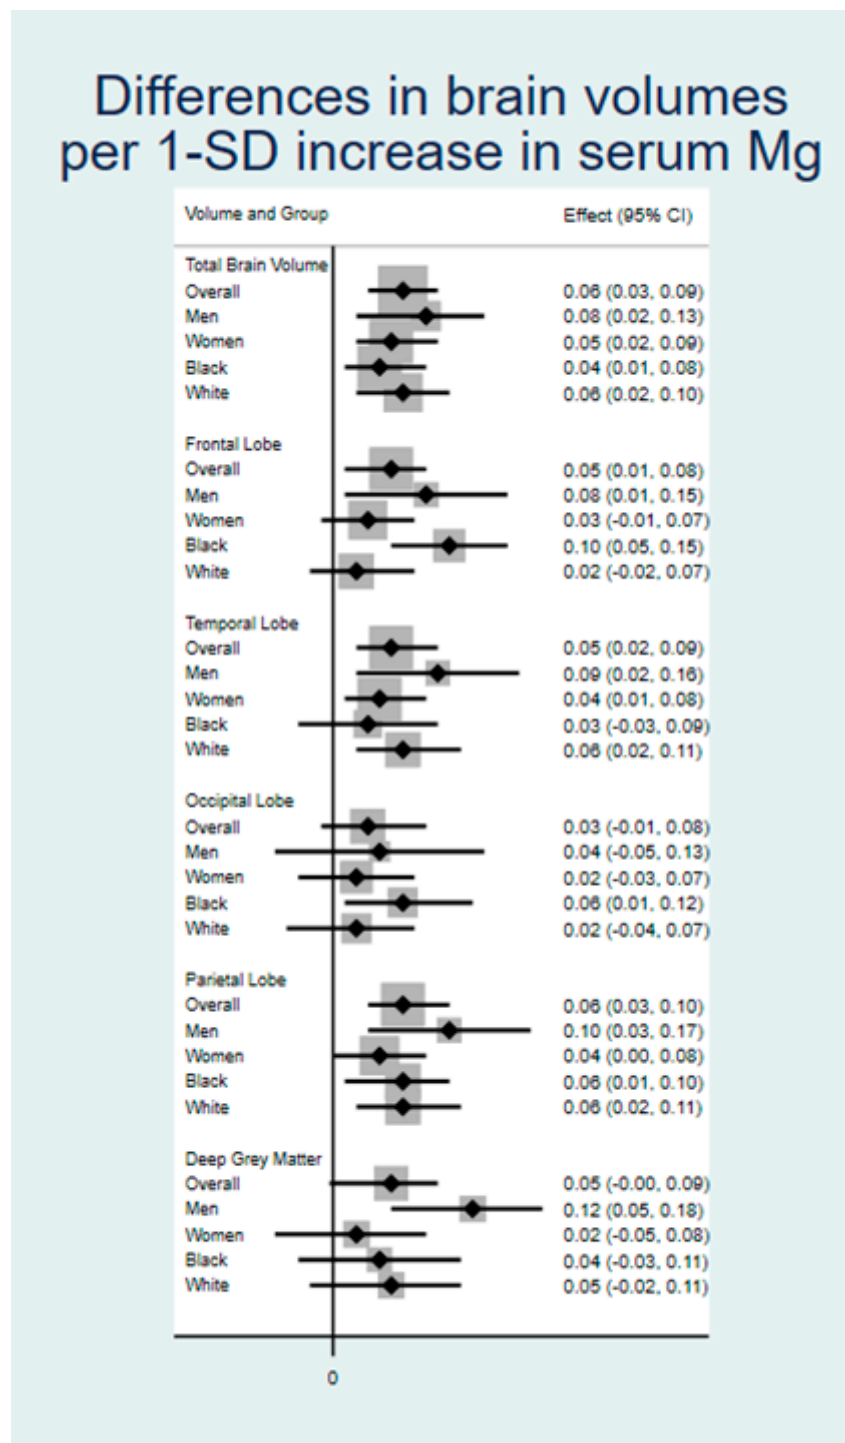

\*Multiple linear regression models adjusted for age, sex, race/center, education, total intracranial volume, LDL and HDL cholesterol, body-mass index, sodium, potassium, calcium, smoking status, hypertension, hypertension medication use, history of coronary heart disease and heart failure, diabetes, eGFR, c-reactive protein, APOE allele. 1-SD Mg: 0.2 mg/dL.

**Supplemental Figure S2.** Forest plot of the association of magnesium with subclinical cerebrovascular disease in participants at visit 5.

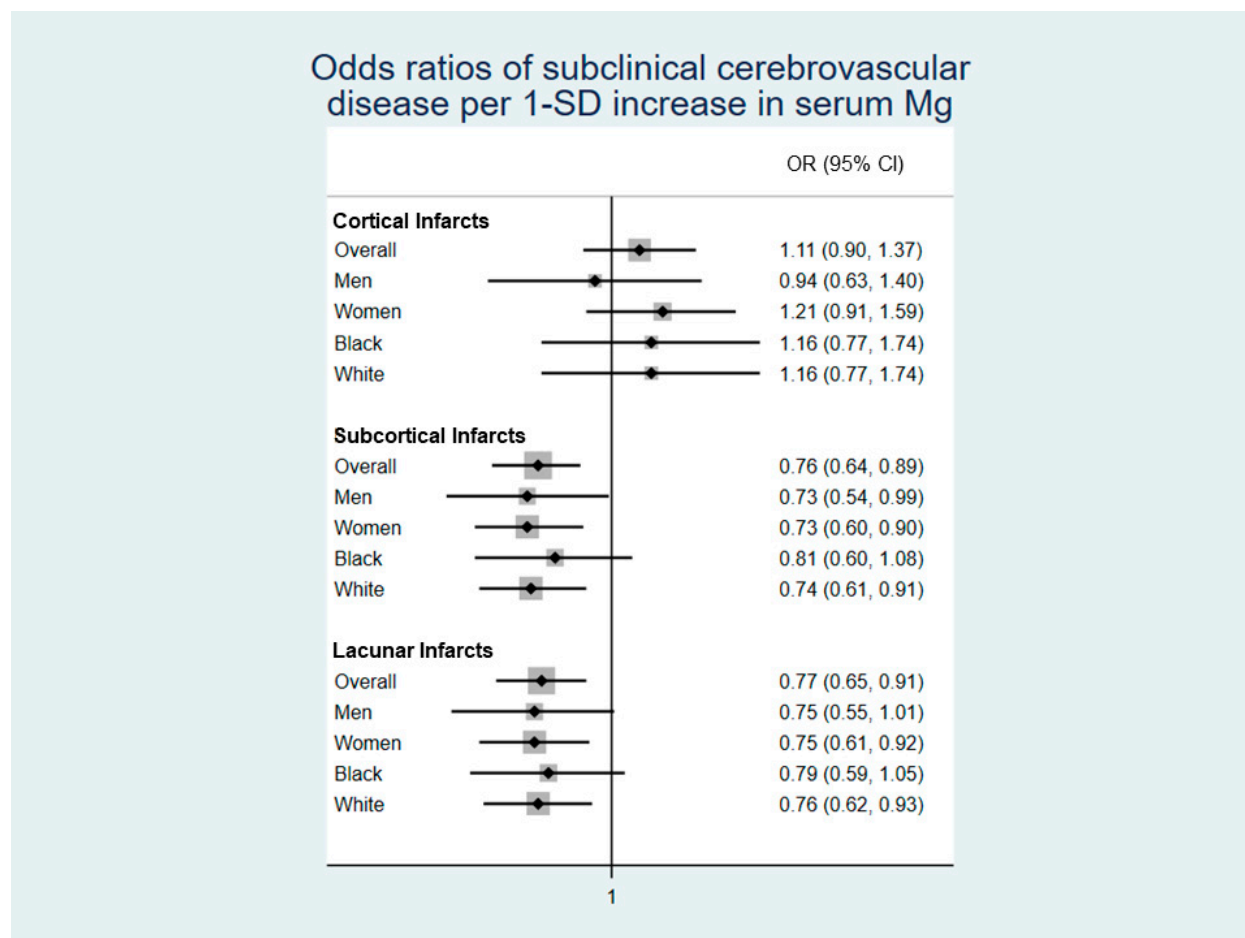

\*Logistic regression models adjusted for age, sex, race/center, education, LDL and HDL cholesterol, body-mass index, sodium, potassium, calcium, smoking status, hypertension, hypertension medication use, history of coronary heart disease and heart failure, diabetes, eGFR, c-reactive protein, APOE allele. 1-SD Mg: 0.2 mg/dL.

**Supplemental Figure S3.** Forest plot of the association of magnesium with log-transformed white matter hyperintensity (WMH) volume in participants at visit 5.

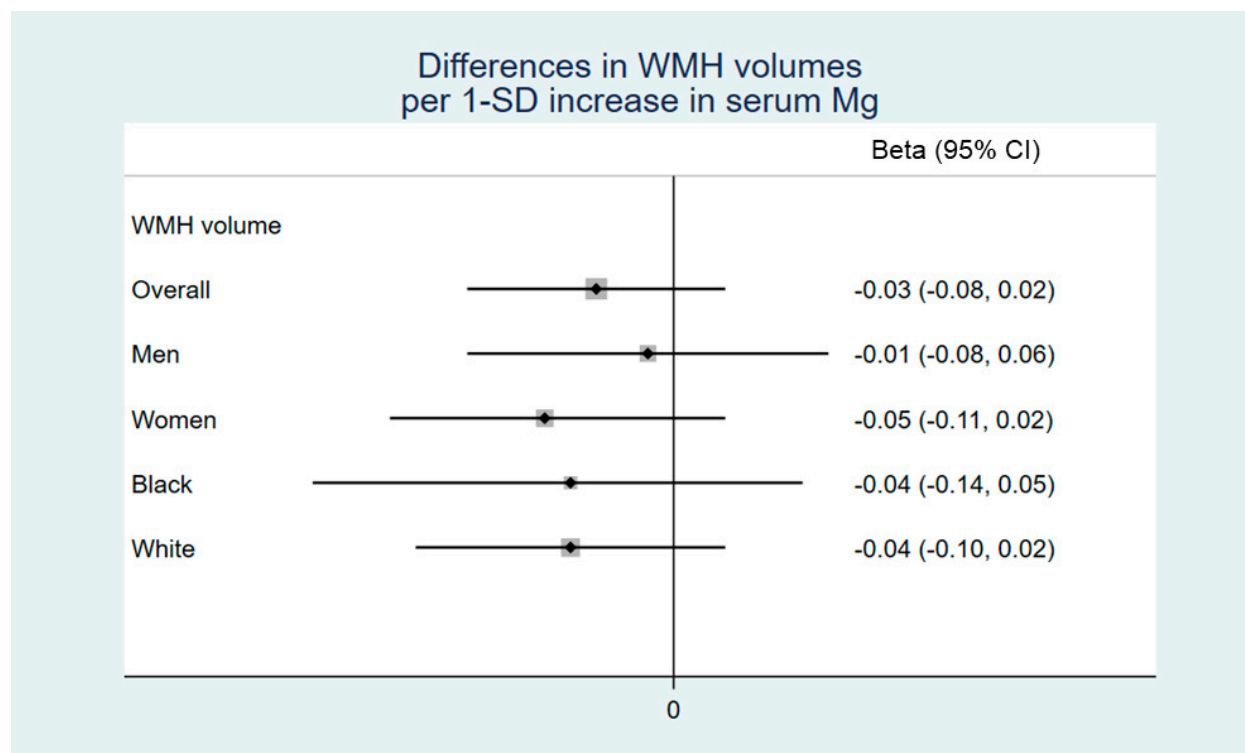

\*Multiple linear regression models adjusted for age, sex, race/center, education, total intracranial volume, LDL and HDL cholesterol, body-mass index, sodium, potassium, calcium, smoking status, hypertension, hypertension medication use, history of coronary heart disease and heart failure, diabetes, eGFR, c-reactive protein, APOE allele. 1-SD Mg: 0.2 mg/dL.

**Supplemental Table S1.** Associations of serum magnesium with brain volumes, by sex, ARIC-NCS 2011–2013.

|                    | Q1   | Q2                 | Q3                 | Q4                 | Q5                 | 1-SD Mg            |
|--------------------|------|--------------------|--------------------|--------------------|--------------------|--------------------|
| <b>Male = 585</b>  |      |                    |                    |                    |                    |                    |
| Total brain volume |      |                    |                    |                    |                    |                    |
| Model 1*           | Ref. | 0.19 (0.02, 0.36)  | 0.23 (0.07, 0.39)  | 0.21 (0.06, 0.36)  | 0.33 (0.17, 0.49)  | 0.10 (0.04, 0.15)  |
| Model 2**          | Ref. | 0.16 (-0.01, 0.33) | 0.19 (0.04, 0.35)  | 0.18 (0.03, 0.33)  | 0.28 (0.12, 0.44)  | 0.08 (0.02, 0.13)  |
| Frontal lobe       |      |                    |                    |                    |                    |                    |
| Model 1            | Ref. | 0.15 (-0.06, 0.37) | 0.25 (0.05, 0.45)  | 0.18 (-0.03, 0.38) | 0.32 (0.12, 0.52)  | 0.09 (0.02, 0.15)  |
| Model 2            | Ref. | 0.15 (-0.06, 0.35) | 0.23 (0.03, 0.43)  | 0.17 (-0.03, 0.37) | 0.30 (0.10, 0.50)  | 0.08 (0.01, 0.15)  |
| Temporal lobe      |      |                    |                    |                    |                    |                    |
| Model 1            | Ref. | 0.29 (0.10, 0.48)  | 0.15 (-0.05, 0.34) | 0.17 (-0.01, 0.36) | 0.32 (0.12, 0.52)  | 0.10 (0.03, 0.16)  |
| Model 2            | Ref. | 0.28 (0.09, 0.48)  | 0.15 (-0.04, 0.35) | 0.20 (-0.02, 0.37) | 0.31 (0.10, 0.53)  | 0.09 (0.02, 0.16)  |
| Occipital lobe     |      |                    |                    |                    |                    |                    |
| Model 1            | Ref. | 0.27 (0.05, 0.48)  | 0.12 (-0.10, 0.35) | 0.27 (0.06, 0.48)  | 0.30 (0.08, 0.52)  | 0.09 (0.01, 0.17)  |
| Model 2            | Ref. | 0.21 (0.004, 0.42) | 0.04 (-0.18, 0.26) | 0.18 (-0.03, 0.40) | 0.17 (-0.07, 0.41) | 0.04 (-0.05, 0.13) |

|                                  |      |                    |                    |                    |                    |                    |
|----------------------------------|------|--------------------|--------------------|--------------------|--------------------|--------------------|
| Parietal lobe                    |      |                    |                    |                    |                    |                    |
| Model 1                          | Ref. | 0.36 (0.15, 0.56)  | 0.22 (0.02, 0.42)  | 0.29 (0.09, 0.49)  | 0.43 (0.22, 0.64)  | 0.12 (0.05, 0.19)  |
| Model 2                          | Ref. | 0.32 (0.11, 0.53)  | 0.19 (-0.01, 0.38) | 0.27 (0.07, 0.46)  | 0.38 (0.17, 0.60)  | 0.10 (0.03, 0.17)  |
| Deep grey matter                 |      |                    |                    |                    |                    |                    |
| Model 1                          | Ref. | 0.08 (-0.13, 0.30) | 0.17 (-0.03, 0.37) | 0.21 (0.02, 0.40)  | 0.33 (0.13, 0.52)  | 0.13 (0.07, 0.19)  |
| Model 2                          | Ref. | 0.06 (-0.16, 0.28) | 0.13 (-0.07, 0.34) | 0.20 (0.00, 0.39)  | 0.30 (0.10, 0.50)  | 0.12 (0.05, 0.18)  |
| <b>Female = 881</b>              |      |                    |                    |                    |                    |                    |
| Total brain volume               |      |                    |                    |                    |                    |                    |
| Model 1*                         | Ref. | 0.07 (-0.03, 0.18) | 0.19 (0.09, 0.29)  | 0.13 (0.02, 0.23)  | 0.15 (0.05, 0.26)  | 0.05 (0.02, 0.08)  |
| Model 2**                        | Ref. | 0.05 (-0.05, 0.15) | 0.19 (0.09, 0.29)  | 0.12 (0.02, 0.23)  | 0.16 (0.05, 0.27)  | 0.05 (0.02, 0.09)  |
| Frontal lobe                     |      |                    |                    |                    |                    |                    |
| Model 1                          | Ref. | 0.08 (-0.05, 0.21) | 0.24 (0.12, 0.36)  | 0.10 (-0.02, 0.22) | 0.14 (0.01, 0.27)  | 0.04 (0.00, 0.08)  |
| Model 2                          | Ref. | 0.04 (-0.10, 0.17) | 0.20 (0.07, 0.32)  | 0.04 (-0.08, 0.17) | 0.09 (-0.04, 0.22) | 0.03 (-0.01, 0.07) |
| Temporal lobe                    |      |                    |                    |                    |                    |                    |
| Model 1                          | Ref. | 0.03 (-0.11, 0.17) | 0.11 (-0.02, 0.23) | 0.07 (-0.05, 0.19) | 0.07 (-0.05, 0.19) | 0.04 (0.00, 0.08)  |
| Model 2                          | Ref. | 0.01 (-0.13, 0.15) | 0.10 (-0.02, 0.23) | 0.06 (-0.06, 0.18) | 0.08 (-0.04, 0.19) | 0.04 (0.01, 0.08)  |
| Occipital lobe                   |      |                    |                    |                    |                    |                    |
| Model 1                          | Ref. | 0.08 (-0.10, 0.26) | 0.21 (0.06, 0.36)  | 0.09 (-0.05, 0.24) | 0.06 (-0.08, 0.20) | 0.04 (-0.01, 0.09) |
| Model 2                          | Ref. | 0.06 (-0.11, 0.24) | 0.18 (0.03, 0.33)  | 0.06 (-0.09, 0.21) | 0.02 (-0.12, 0.17) | 0.02 (-0.03, 0.07) |
| Parietal lobe                    |      |                    |                    |                    |                    |                    |
| Model 1                          | Ref. | 0.05 (-0.08, 0.18) | 0.18 (0.05, 0.31)  | 0.07 (-0.05, 0.18) | 0.07 (-0.05, 0.19) | 0.04 (0.01, 0.07)  |
| Model 2                          | Ref. | 0.04 (-0.09, 0.17) | 0.18 (0.05, 0.31)  | 0.05 (-0.07, 0.18) | 0.06 (-0.07, 0.19) | 0.04 (0.00, 0.08)  |
| Deep grey matter                 |      |                    |                    |                    |                    |                    |
| Model 1                          | Ref. | 0.11 (-0.05, 0.28) | 0.07 (-0.07, 0.21) | 0.09 (-0.06, 0.24) | 0.04 (-0.13, 0.22) | 0.01 (-0.05, 0.07) |
| Model 2                          | Ref. | 0.09 (-0.07, 0.25) | 0.07 (-0.07, 0.21) | 0.09 (-0.07, 0.24) | 0.06 (-0.11, 0.22) | 0.02 (-0.05, 0.08) |
| <b>Sex-magnesium interaction</b> |      |                    |                    |                    |                    |                    |
| Total brain volume               |      | P = 0.32           |                    |                    |                    |                    |
| Frontal lobe                     |      | P = 0.19           |                    |                    |                    |                    |
| Temporal lobe                    |      | P = 0.22           |                    |                    |                    |                    |
| Occipital lobe                   |      | P = 0.19           |                    |                    |                    |                    |
| Parietal lobe                    |      | P = 0.03           |                    |                    |                    |                    |
| Deep grey matter                 |      | P = 0.04           |                    |                    |                    |                    |

\*Model 1 results from multiple linear regression adjusted for age, race/center, education and total intracranial volume. 1-SD Mg: 0.2 mg/dL.

\*\*Model 2 results from multiple linear regression adjusted for model 1, plus LDL and HDL cholesterol, body-mass index, sodium, potassium, calcium, smoking status, hypertension, hypertension medication use, history of coronary heart disease and heart failure, diabetes, eGFR, c-reactive protein, APOE allele. 1-SD Mg: 0.2 mg/DL.

**Supplemental Table S2.** Associations of serum magnesium with brain volumes, by race, ARIC-NCS 2011–2013.

|                      | Q1   | Q2                 | Q3                 | Q4                  | Q5                 | 1-SD Mg            |
|----------------------|------|--------------------|--------------------|---------------------|--------------------|--------------------|
| <b>Black = 422</b>   |      |                    |                    |                     |                    |                    |
| Total brain volume   |      |                    |                    |                     |                    |                    |
| Model 1*             | Ref. | 0.13 (0.01, 0.25)  | 0.21 (0.09, 0.33)  | 0.11 (-0.01, 0.23)  | 0.12 (-0.02, 0.26) | 0.04 (0.00, 0.08)  |
| Model 2**            | Ref. | 0.11 (-0.01, 0.23) | 0.20 (0.08, 0.32)  | 0.09 (-0.04, 0.22)  | 0.14 (0.00, 0.27)  | 0.04 (0.01, 0.08)  |
| Frontal lobe         |      |                    |                    |                     |                    |                    |
| Model 1              | Ref. | 0.12 (-0.03, 0.27) | 0.35 (0.20, 0.51)  | 0.26 (0.10, 0.42)   | 0.23 (0.05, 0.42)  | 0.09 (0.04, 0.14)  |
| Model 2              | Ref. | 0.10 (-0.06, 0.25) | 0.34 (0.18, 0.50)  | 0.25 (0.09, 0.41)   | 0.27 (0.07, 0.46)  | 0.10 (0.05, 0.15)  |
| Temporal lobe        |      |                    |                    |                     |                    |                    |
| Model 1              | Ref. | 0.06 (-0.11, 0.22) | 0.12 (-0.06, 0.29) | -0.02 (-0.18, 0.15) | 0.02 (-0.18, 0.22) | 0.02 (-0.04, 0.07) |
| Model 2              | Ref. | 0.06 (-0.11, 0.22) | 0.12 (-0.05, 0.30) | -0.03 (-0.20, 0.15) | 0.07 (-0.15, 0.28) | 0.03 (-0.03, 0.09) |
| Occipital lobe       |      |                    |                    |                     |                    |                    |
| Model 1              | Ref. | 0.13 (-0.09, 0.34) | 0.33 (0.13, 0.53)  | 0.27 (0.06, 0.47)   | 0.06 (-0.13, 0.25) | 0.06 (0.00, 0.12)  |
| Model 2              | Ref. | 0.10 (-0.11, 0.31) | 0.27 (0.07, 0.47)  | 0.23 (0.02, 0.44)   | 0.10 (-0.10, 0.29) | 0.06 (0.01, 0.12)  |
| Parietal lobe        |      |                    |                    |                     |                    |                    |
| Model 1              | Ref. | 0.14 (-0.02, 0.29) | 0.30 (0.13, 0.46)  | 0.07 (-0.11, 0.24)  | 0.12 (-0.06, 0.30) | 0.05 (0.00, 0.10)  |
| Model 2              | Ref. | 0.13 (-0.02, 0.29) | 0.28 (0.13, 0.44)  | 0.05 (-0.12, 0.23)  | 0.14 (-0.05, 0.33) | 0.06 (0.01, 0.10)  |
| Deep grey matter     |      |                    |                    |                     |                    |                    |
| Model 1              | Ref. | 0.10 (-0.13, 0.33) | 0.07 (-0.11, 0.24) | 0.03 (-0.17, 0.23)  | 0.12 (-0.10, 0.34) | 0.02 (-0.04, 0.08) |
| Model 2              | Ref. | 0.08 (-0.14, 0.30) | 0.08 (-0.10, 0.26) | 0.05 (-0.16, 0.27)  | 0.16 (-0.07, 0.39) | 0.04 (-0.03, 0.11) |
| <b>White = 1,044</b> |      |                    |                    |                     |                    |                    |
| Total brain volume   |      |                    |                    |                     |                    |                    |
| Model 1*             | Ref. | 0.09 (-0.02, 0.22) | 0.19 (0.07, 0.30)  | 0.16 (0.05, 0.26)   | 0.23 (0.12, 0.34)  | 0.07 (0.04, 0.11)  |
| Model 2**            | Ref. | 0.07 (-0.04, 0.19) | 0.16 (0.05, 0.27)  | 0.13 (0.03, 0.24)   | 0.19 (0.08, 0.31)  | 0.06 (0.02, 0.10)  |
| Frontal lobe         |      |                    |                    |                     |                    |                    |
| Model 1              | Ref. | 0.06 (-0.09, 0.21) | 0.16 (0.03, 0.29)  | 0.06 (-0.07, 0.19)  | 0.16 (0.03, 0.28)  | 0.05 (0.00, 0.09)  |
| Model 2              | Ref. | 0.06 (-0.08, 0.21) | 0.14 (0.003, 0.27) | 0.02 (-0.11, 0.15)  | 0.11 (-0.02, 0.24) | 0.02 (-0.02, 0.07) |
| Temporal lobe        |      |                    |                    |                     |                    |                    |
| Model 1              | Ref. | 0.15 (0.01, 0.29)  | 0.10 (-0.03, 0.23) | 0.14 (0.02, 0.26)   | 0.19 (0.07, 0.31)  | 0.07 (0.03, 0.11)  |
| Model 2              | Ref. | 0.14 (0.00, 0.28)  | 0.09 (-0.04, 0.22) | 0.12 (0.00, 0.25)   | 0.16 (0.03, 0.28)  | 0.06 (0.02, 0.11)  |
| Occipital lobe       |      |                    |                    |                     |                    |                    |
| Model 1              | Ref. | 0.14 (-0.03, 0.31) | 0.09 (-0.07, 0.25) | 0.11 (-0.04, 0.26)  | 0.13 (-0.01, 0.28) | 0.05 (-0.01, 0.10) |
| Model 2              | Ref. | 0.11 (-0.06, 0.28) | 0.03 (-0.13, 0.19) | 0.04 (-0.11, 0.19)  | 0.05 (-0.11, 0.20) | 0.02 (-0.04, 0.07) |
| Parietal lobe        |      |                    |                    |                     |                    |                    |
| Model 1              | Ref. | 0.15 (0.01, 0.29)  | 0.11 (-0.03, 0.25) | 0.15 (0.02, 0.27)   | 0.19 (0.06, 0.32)  | 0.07 (0.03, 0.11)  |
| Model 2              | Ref. | 0.14 (-0.01, 0.28) | 0.09 (-0.04, 0.23) | 0.13 (0.00, 0.26)   | 0.16 (0.02, 0.30)  | 0.06 (0.02, 0.11)  |
| Deep grey matter     |      |                    |                    |                     |                    |                    |
| Model 1              | Ref. | 0.08 (-0.08, 0.24) | 0.09 (-0.05, 0.24) | 0.14 (0.00, 0.28)   | 0.15 (0.00, 0.31)  | 0.06 (-0.01, 0.12) |

|                                   |      |                    |                    |                    |                    |                    |
|-----------------------------------|------|--------------------|--------------------|--------------------|--------------------|--------------------|
| Model 2                           | Ref. | 0.04 (-0.12, 0.20) | 0.05 (-0.10, 0.19) | 0.10 (-0.04, 0.25) | 0.13 (-0.03, 0.28) | 0.05 (-0.02, 0.11) |
| <b>Race-magnesium interaction</b> |      |                    |                    |                    |                    |                    |
| Total brain volume                |      | P = 0.58           |                    |                    |                    |                    |
| Frontal lobe                      |      | P = 0.02           |                    |                    |                    |                    |
| Temporal lobe                     |      | P = 0.28           |                    |                    |                    |                    |
| Occipital lobe                    |      | P = 0.19           |                    |                    |                    |                    |
| Parietal lobe                     |      | P = 0.91           |                    |                    |                    |                    |
| Deep grey matter                  |      | P = 0.80           |                    |                    |                    |                    |

\*Model 1 results from multiple linear regression adjusted for age, sex, center, education and total intracranial volume. 1-SD Mg: 0.2 mg/dL.

\*\*Model 2 results from multiple linear regression adjusted for model 1, plus LDL and HDL cholesterol, body-mass index, sodium, potassium, calcium, smoking status, hypertension, hypertension medication use, history of coronary heart disease and heart failure, diabetes, eGFR, c-reactive protein, APOE allele. 1-SD Mg: 0.2 mg/dL.

**Supplemental Table S3.** Associations of serum magnesium with subclinical cerebrovascular disease, by sex, ARIC-NCS 2011–2013.

| Variable             | Q1                  | Q2                  | Q3                 | Q4                  | Q5                  | 1-SD Mg             |
|----------------------|---------------------|---------------------|--------------------|---------------------|---------------------|---------------------|
| <b>Male = 585</b>    |                     |                     |                    |                     |                     |                     |
|                      | Odds Ratios (95%CI) |                     |                    |                     |                     |                     |
| Cortical infarcts    |                     |                     |                    |                     |                     |                     |
| Model 1*             | 1 (ref.)            | 0.88 (0.33, 2.37)   | 0.71 (0.27, 1.86)  | 0.67 (0.28, 1.59)   | 0.67 (0.24, 1.88)   | 0.91 (0.66, 1.25)   |
| Model 2**            | 1 (ref.)            | 1.04 (0.37, 2.91)   | 0.78 (0.25, 2.42)  | 0.84 (0.30, 2.31)   | 0.72 (0.22, 2.32)   | 0.94 (0.63, 1.40)   |
| Subcortical infarcts |                     |                     |                    |                     |                     |                     |
| Model 1              | 1 (ref.)            | 0.85 (0.38, 1.90)   | 0.58 (0.27, 1.24)  | 0.46 (0.23, 0.93)   | 0.47 (0.21, 1.02)   | 0.75 (0.59, 0.95)   |
| Model 2              | 1 (ref.)            | 0.94 (0.39, 2.28)   | 0.63 (0.26, 1.57)  | 0.52 (0.23, 1.17)   | 0.48 (0.19, 1.24)   | 0.75 (0.55, 1.01)   |
| Lacunar infarcts     |                     |                     |                    |                     |                     |                     |
| Model 1              | 1 (ref.)            | 0.82 (0.37, 1.85)   | 0.58 (0.27, 1.24)  | 0.46 (0.23, 0.93)   | 0.42 (0.19, 0.93)   | 0.73 (0.57, 0.93)   |
| Model 2              | 1 (ref.)            | 0.90 (0.37, 2.20)   | 0.62 (0.25, 1.54)  | 0.51 (0.22, 1.14)   | 0.43 (0.16, 1.11)   | 0.73 (0.54, 0.99)   |
|                      | Beta (95%CI)        |                     |                    |                     |                     |                     |
| Ln(WMH volume)†      |                     |                     |                    |                     |                     |                     |
| Model 1              | Ref.                | -0.12 (-0.34, 0.10) | 0.04 (-0.18, 0.27) | -0.06 (-0.30, 0.17) | -0.12 (-0.34, 0.11) | -0.02 (-0.09, 0.05) |
| Model 2              | Ref.                | -0.11 (-0.33, 0.11) | 0.05 (-0.17, 0.27) | -0.04 (-0.28, 0.20) | -0.08 (-0.31, 0.14) | -0.01 (-0.08, 0.06) |
| <b>Female = 881</b>  |                     |                     |                    |                     |                     |                     |
|                      | Odds Ratios (95%CI) |                     |                    |                     |                     |                     |
| Cortical infarcts    |                     |                     |                    |                     |                     |                     |
| Model 1              | 1 (ref.)            | 1.37 (0.53, 3.52)   | 1.50 (0.63, 3.59)  | 1.32 (0.56, 3.11)   | 1.02 (0.42, 2.51)   | 1.11 (0.86, 1.44)   |
| Model 2              | 1 (ref.)            | 1.16 (0.43, 3.12)   | 1.50 (0.61, 3.71)  | 1.54 (0.61, 3.91)   | 1.12 (0.43, 2.90)   | 1.21 (0.91, 1.59)   |

|                                  |              |                    |                      |                      |                     |                      |
|----------------------------------|--------------|--------------------|----------------------|----------------------|---------------------|----------------------|
| Subcortical infarcts             |              |                    |                      |                      |                     |                      |
| Model 1                          | 1 (ref.)     | 0.87 (0.43, 1.77)  | 0.38 (0.19, 0.75)    | 0.63 (0.33, 1.22)    | 0.36 (0.18, 0.71)   | 0.75 (0.62, 0.91)    |
| Model 2                          | 1 (ref.)     | 0.96 (0.47, 1.97)  | 0.39 (0.19, 0.81)    | 0.63 (0.32, 1.23)    | 0.34 (0.17, 0.70)   | 0.75 (0.61, 0.92)    |
| Lacunar infarcts                 |              |                    |                      |                      |                     |                      |
| Model 1                          | 1 (ref.)     | 0.87 (0.43, 1.76)  | 0.38 (0.19, 0.76)    | 0.62 (0.32, 1.20)    | 0.33 (0.16, 0.67)   | 0.74 (0.61, 0.90)    |
| Model 2                          | 1 (ref.)     | 0.95 (0.46, 1.97)  | 0.40 (0.19, 0.82)    | 0.61 (0.30, 1.20)    | 0.31 (0.15, 0.65)   | 0.73 (0.60, 0.90)    |
|                                  | Beta (95%CI) |                    |                      |                      |                     |                      |
| Ln(WMH volume) <sup>†</sup>      |              |                    |                      |                      |                     |                      |
| Model 1                          | Ref.         | 0.11 (-0.08, 0.30) | -0.27 (-0.45, -0.09) | -0.23 (-0.44, -0.02) | -0.11 (-0.29, 0.08) | -0.07 (-0.13, -0.01) |
| Model 2                          | Ref.         | 0.15 (-0.05, 0.35) | -0.23 (-0.41, -0.04) | -0.17 (-0.38, 0.04)  | -0.07 (-0.25, 0.12) | -0.05 (-0.11, 0.02)  |
| <b>Sex-magnesium interaction</b> |              |                    |                      |                      |                     |                      |
| Cortical infarcts                |              | P = 0.41           |                      |                      |                     |                      |
| Subcortical infarcts             |              | P = 0.74           |                      |                      |                     |                      |
| Lacunar infarcts                 |              | P = 0.77           |                      |                      |                     |                      |
| Ln(WMH volume)                   |              | P = 0.65           |                      |                      |                     |                      |

Results from logistic regression (infarcts) and linear regression (WMH volume) adjusted for:

\*Model 1: age, race/center, and education. 1-SD Mg: 0.2 mg/dL.

\*\*Model 2: model 1, plus LDL and HDL cholesterol, body-mass index, sodium, potassium, calcium, smoking status, hypertension, hypertension medication use, history of coronary heart disease and heart failure, diabetes, eGFR, c-reactive protein, APOE allele. 1-SD Mg: 0.2 mg/dL.

† Additionally adjusted for total intracranial volume. WMH: white matter hyperintensities.

**Supplemental Table S4.** Associations of serum magnesium with subclinical cerebrovascular disease, by race, ARIC-NCS 2011-2013.

| Variable             | Q1                  | Q2                | Q3                | Q4                | Q5                | 1-SD Mg           |
|----------------------|---------------------|-------------------|-------------------|-------------------|-------------------|-------------------|
| <b>Black = 422</b>   |                     |                   |                   |                   |                   |                   |
|                      | Odds Ratios (95%CI) |                   |                   |                   |                   |                   |
| Cortical infarcts    |                     |                   |                   |                   |                   |                   |
| Model 1*             | 1 (ref.)            | 0.48 (0.15, 1.51) | 0.62 (0.24, 1.59) | 0.34 (0.13, 0.91) | 0.53 (0.20, 1.40) | 0.95 (0.68, 1.32) |
| Model 2**            | 1 (ref.)            | 0.68 (0.19, 2.38) | 0.80 (0.27, 2.34) | 0.56 (0.18, 1.75) | 0.86 (0.28, 2.62) | 1.16 (0.77, 1.74) |
| Subcortical infarcts |                     |                   |                   |                   |                   |                   |
| Model 1              | 1 (ref.)            | 0.67 (0.32, 1.40) | 0.78 (0.38, 1.62) | 0.31 (0.13, 0.75) | 0.57 (0.22, 1.45) | 0.78 (0.60, 1.02) |
| Model 2              | 1 (ref.)            | 0.78 (0.35, 1.74) | 0.88 (0.41, 1.90) | 0.34 (0.13, 0.93) | 0.56 (0.19, 1.67) | 0.79 (0.59, 1.05) |
| Lacunar infarcts     |                     |                   |                   |                   |                   |                   |
| Model 1              | 1 (ref.)            | 0.62 (0.29, 1.31) | 0.82 (0.39, 1.71) | 0.32 (0.13, 0.79) | 0.60 (0.23, 1.52) | 0.80 (0.61, 1.04) |
| Model 2              | 1 (ref.)            | 0.71 (0.31, 1.61) | 0.91 (0.42, 1.98) | 0.36 (0.13, 0.98) | 0.60 (0.20, 1.77) | 0.81 (0.60, 1.08) |
|                      | Beta (95%CI)        |                   |                   |                   |                   |                   |

|                                   |                     |                     |                      |                      |                     |                      |
|-----------------------------------|---------------------|---------------------|----------------------|----------------------|---------------------|----------------------|
| Ln(WMH volume) <sup>†</sup>       |                     |                     |                      |                      |                     |                      |
| Model 1                           | Ref.                | -0.09 (-0.33, 0.16) | -0.31 (-0.54, -0.08) | -0.27 (-0.49, -0.05) | -0.08 (-0.37, 0.21) | -0.07 (-0.16, 0.03)  |
| Model 2                           | Ref.                | -0.07 (-0.32, 0.18) | -0.26 (-0.49, -0.03) | -0.17 (-0.40, 0.07)  | -0.05 (-0.34, 0.24) | -0.04 (-0.14, 0.05)  |
| <b>White = 1,044</b>              |                     |                     |                      |                      |                     |                      |
|                                   | Odds Ratios (95%CI) |                     |                      |                      |                     |                      |
| Cortical infarcts                 |                     |                     |                      |                      |                     |                      |
| Model 1                           | 1 (ref.)            | 1.93 (0.78, 4.75)   | 1.67 (0.69, 4.08)    | 1.65 (0.71, 3.83)    | 1.18 (0.48, 2.88)   | 1.04 (0.82, 1.31)    |
| Model 2                           | 1 (ref.)            | 1.95 (0.75, 5.08)   | 1.76 (0.69, 4.48)    | 1.79 (0.74, 4.33)    | 1.24 (0.47, 3.28)   | 1.16 (0.77, 1.74)    |
| Subcortical infarcts              |                     |                     |                      |                      |                     |                      |
| Model 1                           | 1 (ref.)            | 0.92 (0.47, 1.79)   | 0.38 (0.20, 0.74)    | 0.18 (0.33, 1.10)    | 0.12 (0.20, 0.71)   | 0.74 (0.61, 0.88)    |
| Model 2                           | 1 (ref.)            | 0.96 (0.48, 1.91)   | 0.41 (0.20, 0.84)    | 0.61 (0.33, 1.13)    | 0.40 (0.20, 0.79)   | 0.76 (0.62, 0.93)    |
| Lacunar infarcts                  |                     |                     |                      |                      |                     |                      |
| Model 1                           | 1 (ref.)            | 0.92 (0.47, 1.80)   | 0.38 (0.20, 0.74)    | 0.59 (0.33, 1.08)    | 0.34 (0.18, 0.64)   | 0.72 (0.60, 0.86)    |
| Model 2                           | 1 (ref.)            | 0.97 (0.49, 1.93)   | 0.41 (0.20, 0.84)    | 0.60 (0.32, 1.12)    | 0.36 (0.18, 0.72)   | 0.74 (0.61, 0.91)    |
|                                   | Beta (95%CI)        |                     |                      |                      |                     |                      |
| Ln(WMH volume) <sup>†</sup>       |                     |                     |                      |                      |                     |                      |
| Model 1                           | Ref.                | 0.01 (-0.17, 0.19)  | -0.15 (-0.32, 0.02)  | -0.16 (-0.36, 0.04)  | -0.14 (-0.31, 0.02) | -0.06 (-0.12, -0.01) |
| Model 2                           | Ref.                | 0.01 (-0.18, 0.20)  | -0.11 (-0.29, 0.07)  | -0.12 (-0.32, 0.07)  | -0.09 (-0.27, 0.08) | -0.04 (-0.10, 0.02)  |
| <b>Race-magnesium interaction</b> |                     |                     |                      |                      |                     |                      |
| Cortical infarcts                 | P = 0.24            |                     |                      |                      |                     |                      |
| Subcortical infarcts              | P = 0.89            |                     |                      |                      |                     |                      |
| Lacunar infarcts                  | P = 0.84            |                     |                      |                      |                     |                      |
| Ln(WMH volume)                    | P = 0.70            |                     |                      |                      |                     |                      |

Results from logistic regression (infarcts) and linear regression (WMH volume) adjusted for:

\*Model 1: age, sex, center, and education. 1-SD Mg: 0.2 mg/dL.

\*\*Model 2: model 1, plus LDL and HDL cholesterol, body-mass index, sodium, potassium, calcium, smoking status, hypertension, hypertension medication use, history of coronary heart disease and heart failure, diabetes, eGFR, c-reactive protein, APOE allele. 1-SD Mg: 0.2 mg/dL.

† Additionally adjusted for total intracranial volume. WMH: white matter hyperintensities.
